# Supplementary material for: Stanniocalcin 1 and 1,25-dihydroxyvitamin D3 cooperatively regulate bone mineralization by osteoblasts
Source: PubMed Central journal article supplement (PMC11447260; doi:10.1038/s12276-024-01302-2), 2024-09-02
Supplement: 12276_2024_1302_MOESM1_ESM.pdf [file 12276_2024_1302_MOESM1_ESM.pdf]

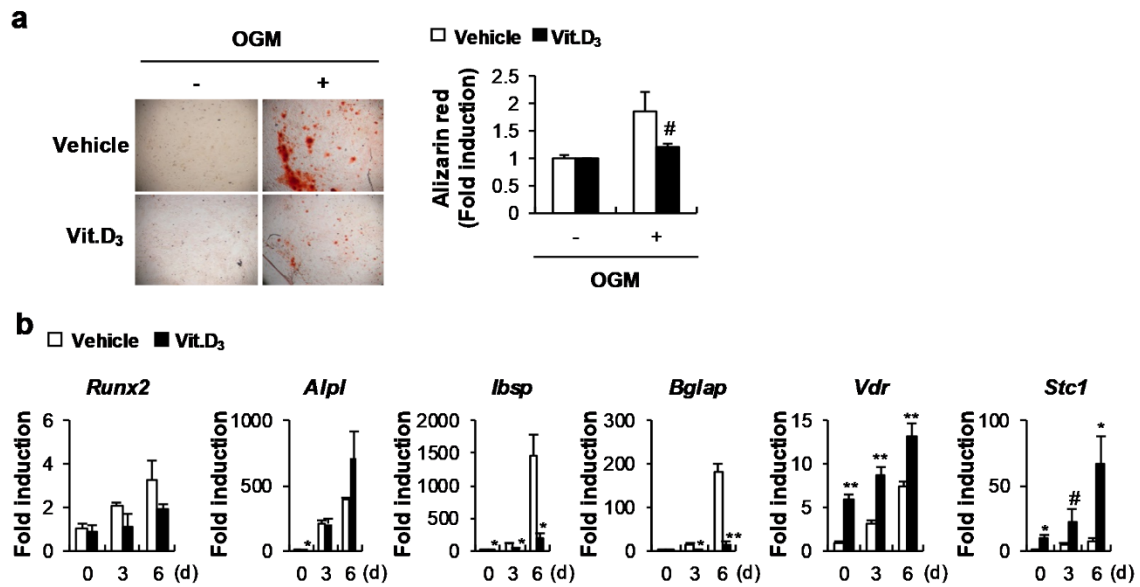

**Supplementary Fig. 1. 1,25(OH)<sub>2</sub>D<sub>3</sub> (Vit.D<sub>3</sub>) inhibits osteoblast differentiation *in vitro*.** (a, b) Osteoblast precursors were cultured in osteogenic medium (OGM) in the presence or absence of Vit.D<sub>3</sub> (10<sup>-8</sup>M). (a) The cultured cells were stained with Alizarin Red (left) and quantified via extraction (right) (N = 3). Bar, 200 μm. (b) Relative mRNA expression levels of the indicated genes were determined by real-time PCR. (N = 3). Data represent the means ± SDs of triplicate samples. #p < 0.05, \*p < 0.01, \*\*p < 0.001 vs. vehicle.

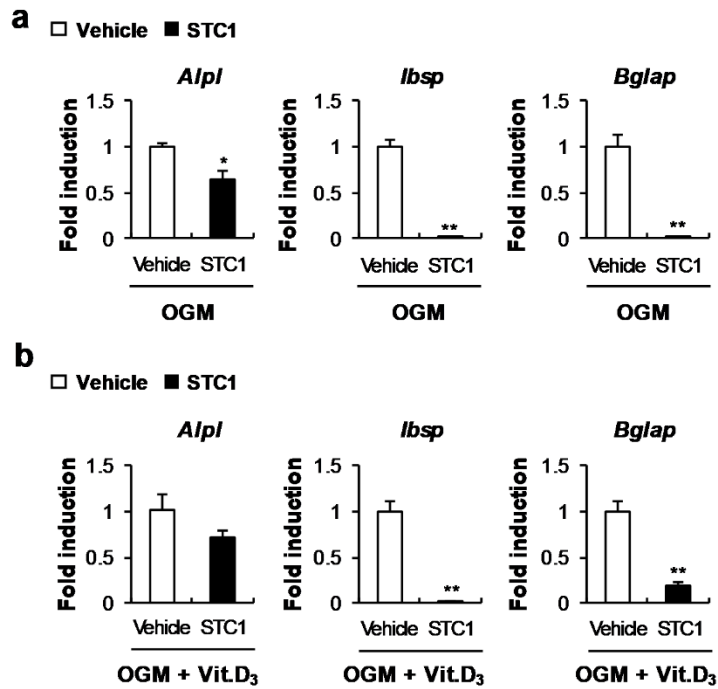

**Supplementary Fig. 2. Exogenous STC1 protein negatively regulates osteoblast-related gene expression.** (a) Osteoblast precursors treated with or without STC1 protein were cultured in OGM. Relative mRNA expression levels of the indicated genes were determined by real-time PCR (N = 3). (b) Osteoblast precursors treated with or without STC1 protein were cultured in OGM + Vit.D<sub>3</sub> (10<sup>-8</sup>M). Relative mRNA expression levels of the indicated genes were determined by real-time PCR (N = 3). Data represent the means ± SDs of triplicate samples. \*p < 0.01, \*\*p < 0.001 vs. vehicle.

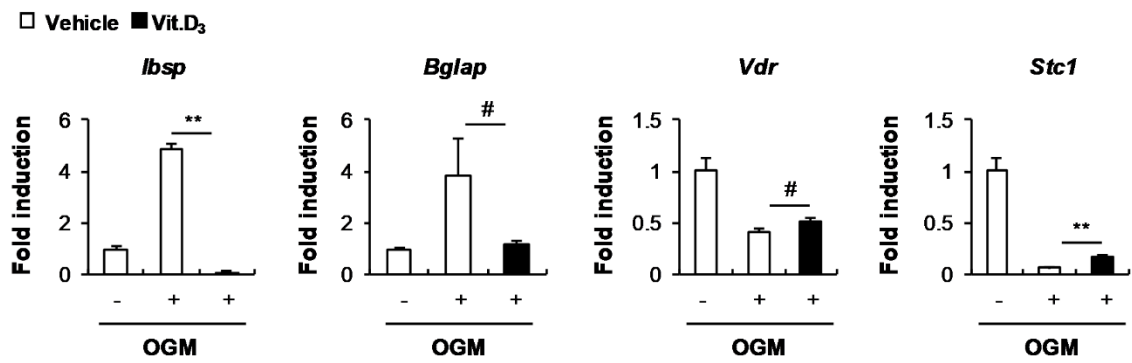

**Supplementary Fig. 3. Vit.D<sub>3</sub> suppresses osteoblast differentiation in BMSCs.** Relative mRNA expression levels of the indicated genes were determined by real-time PCR (N = 3). Data represent the means  $\pm$  SDs of triplicate samples. #p < 0.05, \*\*p < 0.001 vs. vehicle.

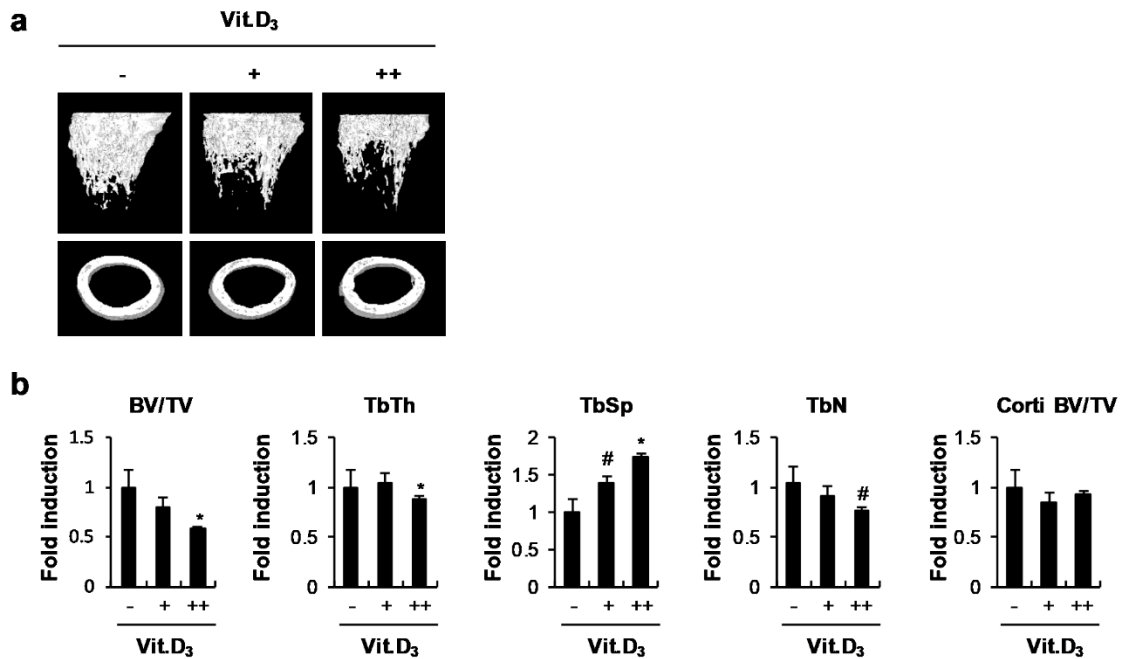

**Supplementary Fig. 4. Excessive Vit.D<sub>3</sub> induces bone loss *in vivo*.** (a, b) Six-week-old ICR mice were intraperitoneally injected with vehicle (control) or various doses of Vit.D<sub>3</sub> (10 µg/kg or 100 µg/kg). Femurs were isolated and subjected to µCT analyses. (a) Representative 3D images of femurs from mice intraperitoneally injected with the control or various doses of Vit.D<sub>3</sub>, as analyzed by µCT. (b) Bone volume/tissue volume (BV/TV), trabecular thickness (Tb.Th), trabecular separation (Tb.Sp), trabecular number (Tb.N), and cortical bone volume/tissue volume (Corti BV/TV) were determined by µCT (N = 4). Data represent the means ± SDs. #p < 0.05, \*p < 0.01 vs. control.
